# Supplementary material for: Mesenchymal stem cells and macrophages interact through IL-6 to promote inflammatory breast cancer in pre-clinical models
Source: PubMed Central journal article supplement (PMC5347707; doi:10.18632/oncotarget.12694), 2016-10-15
Supplement: oncotarget-07-82482-s001.pdf [file oncotarget-07-82482-s001.pdf]

## Mesenchymal stem cells and macrophages interact through IL-6 to promote inflammatory breast cancer in pre-clinical models

### Supplementary Materials

**Supplementary Table S1:**

|         | EGF      | IFNg     | IL-10    | IL-12P70 | IL-1a    | IL-1b    | IL-2     | IL-3     | IL-4     | IL-5     | IL-6     | TNFa     | VEGF     |
|---------|----------|----------|----------|----------|----------|----------|----------|----------|----------|----------|----------|----------|----------|
| (pg/mL) | Obs Conc | Obs Conc | Obs Conc | Obs Conc | Obs Conc | Obs Conc | Obs Conc | Obs Conc | Obs Conc | Obs Conc | Obs Conc | Obs Conc | Obs Conc |
| MSC CM  | 0        | 8.47     | 0        | 0        | 0        | 0        | 0        | 5.01     | 0        | 0        | 1680.12  | 1.3      | 205.36   |
| MSC CM  | 0        | 12.02    | 0        | 0        | 0        | 0        | 0        | 4.37     | 0        | 0        | 2064.71  | 1.71     | 215.18   |
